# Supplementary material
Source: Springer Nature journal article supplement (https://www.springermedizin.de/resource/supplementary/12882_2014_800_MOESM3_ESM.pdf/9454316)

■ Patients  
 ▲ Controls

□ CKD stage IV (n=11)  
 ■ CKD stage III (n=9)

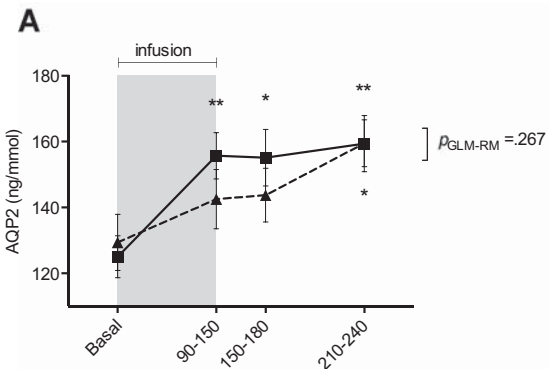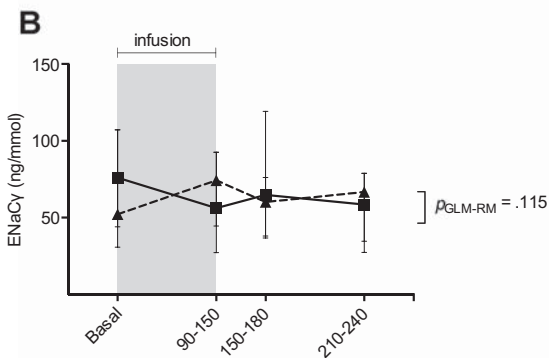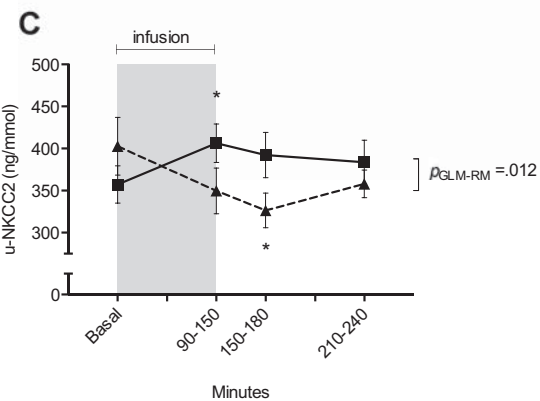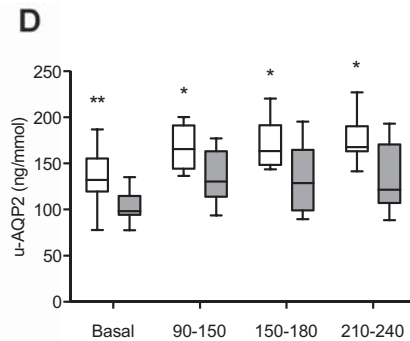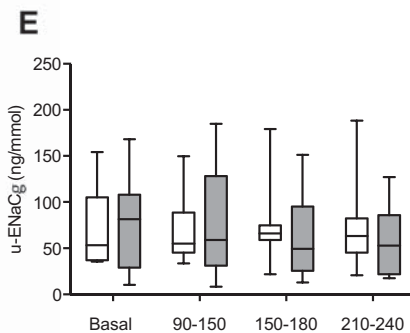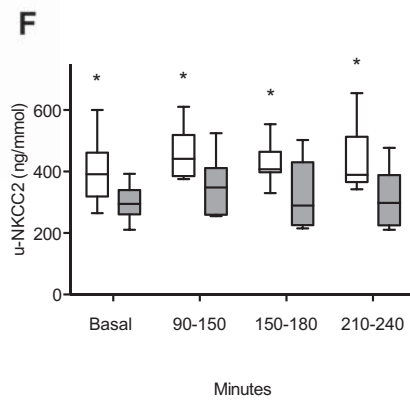

Supplement: MOESM3 [file 9454316]
